# Supplementary material for: Analysis of Volatile Components of Jasmine and Jasmine Tea during Scenting Process
Source: MDPI journal article supplement (doi:10.3390/molecules27020479), 2022-01-12
Supplement: s1 [file s1]

## Supplementary Table

**Table S1 The qualitative and quantitative analysis of volatile components of jasmine flower**

| No. | a. RI | Compound                                                                                              | b. Identification method | Linear equations       | R     | Linear range(μg/L) | LOD (μg/L) | LOQ (μg/L) |
|-----|-------|-------------------------------------------------------------------------------------------------------|--------------------------|------------------------|-------|--------------------|------------|------------|
| 15  | 1396  | (1S,4S,4aS)-1-Isopropyl-4,7-dimethyl-1,2,3,4,4a,5-hexahydronaphthalene                                | MS                       | y = 0.014x + 18.9259   | 0.994 | 2.033-20330.003    | 0.283      | 0.8556     |
| 15  | 1116  | (E)-4,8-Dimethylnona-1,3,7-triene                                                                     | MS                       | y = 0.014x + 18.9258   | 0.994 | 2.033-20330.002    | 0.283      | 0.8556     |
| 13  | 1352  | alpha-Cubebene                                                                                        | MS                       | y = 13.409x - 0.2456   | 0.994 | 2.004-400.801      | 0.0029     | 0.0087     |
| 22  | 1518  | alpha-Farnesene                                                                                       | MS                       | y = 0.3317x - 0.1144   | 0.994 | 22.014-2517.500    | 0.0356     | 0.0976     |
| 16  | 1492  | alpha-Guaiene                                                                                         | MS                       | y = 2.5452x + 7.6260   | 0.995 | 2.001-20010.001    | 0.0298     | 0.1041     |
| 17  | 1482  | gamma-Murolene                                                                                        | MS                       | y = 1.1718x - 0.1008   | 0.991 | 2.003-1251.875     | 0.0019     | 0.0058     |
| 7   | 1646  | tau-Cadinol                                                                                           | MS                       | y = 5.2054x - 3.3048   | 0.996 | 2.035-40700.001    | 0.3182     | 0.9242     |
| 9   | 1240  | 1H-Tetrazol-5-amine                                                                                   | MS                       | y = 13.709x - 18.391   | 0.991 | 1.996-79920.002    | 0.3842     | 1.1672     |
| 19  | 910   | 2-Methylbut-2-en-1-yl acetate                                                                         | MS                       | y = 0.0686x + 78.4541  | 0.995 | 2.013-10065.000    | 0.0312     | 0.0144     |
| 9   | 1300  | 2-Phenylethyl tiglate                                                                                 | MS                       | y = 13.709x - 18.390   | 0.991 | 1.996-79920.001    | 0.3842     | 1.1672     |
| 19  | 1046  | 3-Carene                                                                                              | MS                       | y = 0.0686x + 78.4543  | 0.995 | 2.013-10065.002    | 0.0312     | 0.0144     |
| 8   | 926   | 3-Hexenoic acid, methyl ester                                                                         | MS                       | y = 1.5029x -4.1255    | 0.997 | 2.011-5027.500     | 0.0124     | 0.0466     |
| 11  | 1499  | 3-Pyridinecarbonitrile, 1,4-dihydro-1-methyl-5-Hexen-3-one                                            | MS                       | y = 8.2717x + 0.3221   | 0.997 | 2.001-20010.003    | 0.0355     | 0.1236     |
| 11  | 1267  | 5-Hexen-3-one                                                                                         | MS                       | y = 8.2717x + 0.3221   | 0.997 | 2.001-20010.004    | 0.0355     | 0.1236     |
| 18  | < 800 | Acetic acid, butyl ester                                                                              | MS                       | y = 79.247x - 179.83   | 0.998 | 2.013-10065.000    | 0.0312     | 0.0941     |
| 18  | 1011  | Acetic acid, hexyl ester                                                                              | MS                       | y = 79.247x - 179.84   | 0.998 | 2.013-10065.001    | 0.0312     | 0.0941     |
| 15  | 1446  | Aromandendrene                                                                                        | MS                       | y = 0.014x + 18.9256   | 0.994 | 2.033-20330.000    | 0.283      | 0.8556     |
| 9   | 1140  | Benzene, 1-isocyano-3-methyl-                                                                         | MS                       | y = 13.709x - 18.392   | 0.991 | 1.996-79920.003    | 0.3842     | 1.1672     |
| 17  | 1035  | Bicyclo [3.1.0] hex-2-ene, 2-methyl-5-(1-methylethyl)-                                                | MS                       | y = 1.1718x - 0.1009   | 0.991 | 2.003-1251.875     | 0.0019     | 0.0058     |
| 5   | 1539  | Bisabolol                                                                                             | MS                       | y = 0.2311x - 0.5322   | 0.997 | 10.000-100098.001  | 0.0461     | 0.1392     |
| 8   | 1190  | Butanoic acid, 3-hexenyl ester, (E)-                                                                  | MS                       | y = 1.5029x -4.1257    | 0.997 | 2.011-5027.502     | 0.0124     | 0.0466     |
| 12  | 992   | Butanoic acid, butyl ester                                                                            | MS                       | y = 58.6021x+0.2183    | 0.995 | 1.986-198.602      | 0.001      | 0.0032     |
| 12  | < 800 | Butanoic acid, ethyl ester                                                                            | MS                       | y = 58.6021x+0.2181    | 0.995 | 1.986-198.600      | 0.001      | 0.0032     |
| 12  | 1348  | Butanoic acid, phenylmethyl ester                                                                     | MS                       | y = 58.6021x+0.2182    | 0.995 | 1.986-198.601      | 0.001      | 0.0032     |
| 6   | 1374  | Butyl benzoate                                                                                        | MS                       | y = 10.0408x + 36.2417 | 0.998 | 2.003-20030.000    | 0.1649     | 0.5121     |
| 8   | 1542  | Cubenene                                                                                              | MS                       | y = 1.5029x -4.1256    | 0.997 | 2.011-5027.501     | 0.0124     | 0.0466     |
| 18  | 1339  | Cyclohexane, 1-ethenyl-1-methyl-2-(1-methylethenyl)-4-(1-methylethylidene)-                           | MS                       | y = 79.247x - 179.86   | 0.998 | 2.013-10065.003    | 0.0312     | 0.0941     |
| 11  | 1393  | Cyclohexane, 1-ethenyl-1-methyl-2,4-bis(1-methylethenyl)-, [1S-(1alpha, 2beta, 4beta)]-               | MS                       | y = 8.2717x + 0.3218   | 0.997 | 2.001-20010.001    | 0.0355     | 0.1236     |
| 17  | 1086  | Cyclohexene, 3-methyl-6-(1-methylethylidene)-                                                         | MS                       | y = 1.1718x - 0.1010   | 0.991 | 2.003-1251.875     | 0.0019     | 0.0058     |
| 21  | 1546  | Naphthalene, 1,2,4a,5,6,8a-hexahydro-4,7-dimethyl-1-(1-methylethyl)-, [1S-(1alpha,4a beta,8a alpha)]- | MS                       | y = 4.5019x + 2.1466   | 0.998 | 10.000-100098.001  | 0.0461     | 0.1392     |
| 15  | 1432  | (1R,2S,6S,7S,8S)-8-Isopropyl-1-methyl-3-methylenetricyclo [4.4.0.02,7] decane-rel-                    | MS                       | y = 0.014x + 18.9260   | 0.994 | 2.033-20330.004    | 0.283      | 0.8556     |
| 23  | 1502  | (1S,2E,6E,10R)-3,7,11,11-Tetramethylbicyclo [8.1.0] undeca-2,6-diene                                  | MS                       | y = 0.1845x + 0.1031   | 0.997 | 2.013-10065.000    | 0.0312     | 0.0921     |
| 23  | 1289  | n-Valeric acid cis-3-hexenyl ester                                                                    | MS                       | y = 0.1845x + 0.1031   | 0.997 | 2.013-10065.000    | 0.0312     | 0.0921     |
| 23  | 1019  | Pentanoic acid, 4-methyl-2-oxo-, methyl ester                                                         | MS                       | y = 0.1845x + 0.1031   | 0.997 | 2.013-10065.000    | 0.0312     | 0.0921     |
| 11  | 1373  | s-Triazolo[4,3-a] pyridine, 3,5,7-trimethyl-                                                          | MS                       | y = 8.2717x + 0.3219   | 0.997 | 2.001-20010.002    | 0.0355     | 0.1236     |
| 2   | 1504  | α-Murolene                                                                                            | MS                       | y = 0.081x +0.9257     | 0.998 | 2.023-101.151      | 0.0025     | 0.0072     |
| 5   | 1528  | 1,2,3,5,6,8a-hexahydro-4,7-dimethyl-1-(1-methylethyl)                                                 | MS                       | y = 25.6214x +1.4573   | 0.994 | 2.013-50.326       | 0.001      | 0.0029     |

|    |      |                                                                                                                        |    |    |     |                        |       |                 |        |        |
|----|------|------------------------------------------------------------------------------------------------------------------------|----|----|-----|------------------------|-------|-----------------|--------|--------|
| 22 | 1558 | (Z, E)-alpha-Farnesene                                                                                                 | MS | RI | std | y = 0.3317x - 0.1144   | 0.994 | 22.014-2517.500 | 0.0356 | 0.0976 |
| 2  | 985  | beta-Myrcene                                                                                                           | MS | RI | std | y = 0.081x + 0.9256    | 0.998 | 2.023-101.150   | 0.0025 | 0.0072 |
| 24 | 1568 | 1,6,10-Dodecatrien-3-ol, 3,7,11-trimethyl-, (E)-                                                                       | MS | RI | std | y = 4.1012x + 0.4521   | 0.99  | 2.014-2517.500  | 0.0356 | 0.0976 |
| 20 | 1406 | 1H-Cycloprop[e]azulene, 1a,2,3,4,4a,5,6,7b-octahydro-1,1,4,7-tetramethyl-, [1aR-(1a alpha, 4 alpha,4a beta,7b alpha)]- | MS | RI | std | y = 1.7589x - 2.3431   | 0.996 | 2.024-202.400   | 0.0063 | 0.0182 |
| 1  | 806  | 3-Hexen-1-ol, (Z)-                                                                                                     | MS |    | std | y = 0.5003x + 0.0624   | 0.99  | 2.039-1274.375  | 0.0016 | 0.0043 |
| 3  | 1005 | 3-Hexen-1-ol, acetate, (E)-                                                                                            | MS | RI | std | y = 42.428x - 70.243   | 0.99  | 10.020-5010.000 | 0.0024 | 0.0065 |
| 23 | 1566 | 3-Hexen-1-ol, benzoate, (Z)-                                                                                           | MS | RI | std | y = 0.1845x + 0.1031   | 0.997 | 2.013-10065.000 | 0.0312 | 0.0921 |
| 13 | 1259 | Acetic acid, 2-phenylethyl ester                                                                                       | MS | RI | std | y = 13.409x - 0.2455   | 0.994 | 2.004-400.800   | 0.0049 | 0.0087 |
| 9  | 1172 | Acetic acid, phenylmethyl ester                                                                                        | MS |    | std | y = 13.709x - 18.389   | 0.991 | 1.996-79920.000 | 0.3842 | 1.1672 |
| 14 | 1272 | Benzoic acid, 2-hydroxy-, ethyl ester                                                                                  | MS | RI | std | y = 0.7502x + 2.1163   | 0.998 | 2.024-202.400   | 0.0063 | 0.0182 |
| 10 | 1174 | Benzoic acid, ethyl ester                                                                                              | MS | RI | std | y = 1.3401x + 0.1546   | 0.991 | 2.042-25552.500 | 0.0049 | 0.0142 |
| 6  | 1094 | Benzoic acid, methyl ester                                                                                             | MS | RI | std | y = 10.0408x + 36.2418 | 0.998 | 2.003-20030.001 | 0.1649 | 0.5121 |
| 5  | 1031 | Benzyl alcohol                                                                                                         | MS |    | std | y = 0.2311x - 0.5321   | 0.997 | 10.000-100098.  | 0.0461 | 0.1392 |
| 8  | 1143 | Butanoic acid, 3-hexenyl ester, (Z)-                                                                                   | MS | RI | std | y = 1.5029x - 4.1256   | 0.997 | 2.011-5027.501  | 0.0124 | 0.0466 |
| 21 | 1422 | Caryophyllene                                                                                                          | MS |    | std | y = 4.5019x + 2.1465   | 0.998 | 10.000-100098.  | 0.0461 | 0.1392 |
| 19 | 1390 | cis-3-Hexenyl cis-3-hexenoate                                                                                          | MS |    | std | y = 0.0686x + 78.4542  | 0.995 | 2.013-10065.001 | 0.0312 | 0.0144 |
| 12 | 1236 | cis-3-Hexenyl-alpha-methylbutyrate                                                                                     | MS | RI | std | y = 58.6021x + 0.2181  | 0.995 | 1.986-198.600   | 0.001  | 0.0032 |
| 17 | 1377 |                                                                                                                        | MS |    |     | y = 1.1718x - 0.1007   | 0.991 | 2.003-1251.875  | 0.0019 | 0.0058 |
| 4  | 1024 | D-Limonene                                                                                                             | MS | RI | std | y = 25.6214x + 1.4572  | 0.994 | 2.013-50.325    | 0.001  | 0.0029 |
| 18 | 1383 | Hexanoic acid, 3-hexenyl ester, (Z)-                                                                                   | MS | RI | std | y = 79.247x - 179.85   | 0.998 | 2.013-10065.002 | 0.0312 | 0.0941 |
| 7  | 1105 | Linalool                                                                                                               | MS | RI | std | y = 5.2054x - 3.3047   | 0.996 | 2.035-40700.000 | 0.3182 | 0.9242 |
| 16 | 1343 | Methyl anthranilate                                                                                                    | MS | RI | std | y = 2.5452x + 7.6259   | 0.995 | 2.001-20010.000 | 0.0298 | 0.1041 |
| 11 | 1195 | Methyl salicylate                                                                                                      | MS |    | std | y = 8.2717x + 0.3217   | 0.997 | 2.001-20010.000 | 0.0355 | 0.1236 |
| 15 | 1297 | indole                                                                                                                 | MS | RI | std | y = 0.014x + 18.9257   | 0.994 | 2.033-20330.001 | 0.283  | 0.8556 |

Note: a. RI: Retention index of compounds on HP-5MS. b. Method of identification: MS, Comparison of mass spectra with MS libraries and retention times. RI, retention index. Std, confirmed by authentic standards. LOD: Limit of detection. LOQ: Limit of quantitation.

**Table S2 The quantitative results of volatile constituents of jasmine**

| Compounds                         | The quantitative of volatile components of the traditional scenting process jasmine |        |        |        |        |        |        |        | The quantitative of volatile components of the new scenting process jasmine |       |      |       |       |       |       |        | The quantitative of volatile components of the jasmine |       |       |       |        |        |        |        |
|-----------------------------------|-------------------------------------------------------------------------------------|--------|--------|--------|--------|--------|--------|--------|-----------------------------------------------------------------------------|-------|------|-------|-------|-------|-------|--------|--------------------------------------------------------|-------|-------|-------|--------|--------|--------|--------|
|                                   | 0h                                                                                  | 2h     | 4h     | 6h     | 8h     | 10h    | 12h    | 14h    | 0h                                                                          | 2h    | 4h   | 6h    | 8h    | 10h   | 12h   | 14h    | 0h                                                     | 2h    | 4h    | 6h    | 8h     | 10h    | 12h    | 14h    |
| 3-Hexen-1-ol, acetate, (E)-       | 104.63                                                                              | 174.65 | 226.81 | 402.89 | 305.99 | 491.22 | 226.10 | 504.48 | 348.77                                                                      | 9.82  | 9.60 | 10.56 | 9.50  | 10.99 | 10.75 | 7.53   | 5.43                                                   | 5.42  | 2.64  | 3.79  | 4.04   | 3.73   | 2.49   | 2.64   |
| Benzoic acid, methyl ester        | 140.83                                                                              | 338.44 | 321.21 | 240.81 | 92.29  | 128.76 | 58.68  | 65.68  | 469.42                                                                      | 10.01 | 9.29 | 15.22 | 13.70 | 15.17 | 15.05 | 10.54  | 1.06                                                   | 1.17  | 0.51  | 0.72  | LOD    | LOD    | LOD    | LOD    |
| Acetic acid, phenylmethyl ester   | ####                                                                                | ####   | ####   | ####   | ####   | ####   | ####   | ####   | ####                                                                        | ####  | #### | ####  | ####  | ####  | ####  | 792.26 | ####                                                   | ####  | ####  | ####  | ####   | ####   | ####   | ####   |
| Benzoic acid, ethyl ester         | 6.41                                                                                | 22.18  | 17.39  | 19.88  | 6.30   | 2.81   | 2.70   | 0.86   | 21.37                                                                       | LOQ   | LOQ  | LOQ   | LOQ   | LOQ   | LOQ   | LOQ    | 0.95                                                   | 0.94  | 0.48  | 0.79  | LOD    | LOD    | LOD    | LOD    |
| Methyl anthranilate               | 162.79                                                                              | 230.68 | 149.31 | 229.24 | 136.13 | 132.71 | 105.33 | 102.99 | 42.22                                                                       | 1.03  | 1.03 | 1.02  | 0.91  | 1.01  | 1.01  | 0.71   | 14.60                                                  | 16.81 | 8.50  | 7.94  | LOD    | LOD    | LOD    | LOD    |
| Butanoic acid, phenylmethyl ester | ####                                                                                | ####   | ####   | ####   | 915.10 | ####   | 913.98 | ####   | 4.12                                                                        | 1.02  | 1.02 | 1.02  | 0.92  | 0.99  | 0.99  | 0.69   | 29.64                                                  | 34.95 | 34.31 | 59.07 | 226.41 | 180.04 | 138.88 | 155.82 |

|                                                        |        |        |        |        |        |        |        |        |        |        |        |        |        |        |        |        |        |        |        |        |        |        |        |        |     |
|--------------------------------------------------------|--------|--------|--------|--------|--------|--------|--------|--------|--------|--------|--------|--------|--------|--------|--------|--------|--------|--------|--------|--------|--------|--------|--------|--------|-----|
| 3-Hexen-1-ol, benzoate, (Z)-<br>(Z, E)-alpha-Farnesene | 173.93 | 197.85 | 171.15 | 303.09 | 146.94 | 122.05 | 5.28   | 59.14  | 1.82   | 0.76   | 0.75   | 0.73   | 0.66   | 0.57   | 0.73   | 0.51   | 0.16   | LOD    | LOD    | LOD    | LOD    | 0.14   | 0.13   | 0.18   | LOD |
|                                                        | LOD    | LOD    | LOD    | LOD    | 0.24   | 0.10   | 0.23   | 0.28   | 6.83   | 0.51   | 0.49   | 1.09   | 0.98   | 0.84   | 0.55   | 0.39   | 517.27 | 721.29 | 445.54 | 638.69 | ####   | 616.93 | 480.46 | 398.13 |     |
|                                                        | 5.47   | 13.16  | 14.72  | 33.15  | 30.59  | 41.88  | 23.82  | 322.78 | 98.40  | 2.76   | 2.67   | 3.83   | 3.45   | 5.23   | 5.97   | 4.18   | 0.20   | 0.21   | 0.16   | 0.16   | LOQ    | LOQ    | LOQ    | LOQ    |     |
| Benzyl alcohol                                         | 29.52  | 48.41  | 34.75  | 42.82  | 30.97  | 46.77  | 27.56  | 45.91  | 641.42 | 0.62   | 0.59   | 1.20   | 1.08   | 0.56   | 0.45   | 0.31   | 0.14   | ####   | 839.97 | 863.38 | 798.37 | ####   | 953.00 | ####   |     |
| Linalool                                               | 192.43 | 340.65 | 280.48 | 450.90 | 250.02 | 285.46 | 181.04 | 285.50 | 0.11   | 3.48   | 4.05   | 7.87   | 7.08   | 6.38   | 5.08   | 3.56   | 0.32   | 0.21   | 0.14   | 0.11   | 0.21   | 0.36   | 0.26   | 0.30   |     |
| Butanoic acid, ethyl ester                             | 0.07   | 43.88  | 49.06  | 110.51 | 99.46  | 652.23 | 58.64  | 41.05  | 0.07   | 43.88  | 49.06  | 110.51 | 99.46  | 652.23 | 58.64  | 41.05  | 9.31   | 9.58   | 4.93   | 5.20   | 43.36  | 97.83  | 55.65  | 65.29  |     |
| Acetic acid, butyl ester                               | LOD    | 0.42   | 4.43   | 4.04   | 6.23   | 5.61   | 5.64   | 3.85   | 2.69   | 30.29  | 15.99  | 8.50   | 53.04  | LOQ    | LOQ    | LOQ    | LOQ    |     |
| 2-Methylbut-2-en-1-yl acetate                          | LOD    | 0.43   | 0.92   | 1.24   | 1.01   | 0.91   | 1.14   | 1.16   | 0.81   | 0.59   | 0.65   | 0.31   | 0.40   | 0.40   | 0.43   | 0.25   | LOD    |     |
| 3-Hexenoic acid, methyl ester                          | LOD    | 0.04   | 582.17 | 755.90 | ####   | ####   | ####   | 783.39 | 548.37 | 1.10   | 1.13   | 0.76   | 1.27   | 3.41   | 2.87   | 2.17   | 2.45   |     |
| Butanoic acid, butyl ester                             | LOD    | 0.01   | 0.25   | 0.24   | 0.34   | 0.30   | 0.30   | LOQ    | LOQ    | 11.65  | 11.81  | 5.35   | 4.10   | 3.73   | 5.93   | 4.15   | 4.76   |     |
| Acetic acid, hexyl ester                               | 90.68  | 151.11 | 194.89 | 345.14 | 260.53 | 417.87 | 193.25 | 428.41 | 1.53   | 161.38 | 115.80 | 142.72 | 128.45 | 131.09 | 150.11 | 105.08 | 1.13   | 1.59   | 1.17   | 1.89   | 4.57   | 3.02   | 3.09   | 2.82   |     |
| Pentanoic acid, 4-methyl-2-oxo-, methyl ester          | 0.01   | 0.14   | 0.04   | 0.19   | 0.03   | 0.32   | 0.06   | 1.09   | 0.04   | 0.18   | 0.17   | 0.25   | 0.23   | 0.24   | 0.26   | 0.19   | 3.04   | 3.61   | 1.99   | 2.36   | 0.12   | 0.12   | 0.12   | 5.53   |     |
| Butanoic acid, 3-hexenyl ester, (Z)-                   | LOD    | 2.27   | ####   | ####   | 802.70 | 722.43 | 761.90 | 594.81 | 416.37 | 2.13   | 2.27   | 1.10   | 1.37   | 1.79   | 1.46   | 0.95   | 1.04   |     |
| Methyl salicylate                                      | 52.38  | 106.47 | 135.51 | 142.03 | 90.85  | 98.84  | 70.06  | 88.04  | 174.61 | 0.14   | LOD    | 0.18   | 0.16   | 0.15   | LOD    | LOD    | 2.09   | 2.15   | 1.18   | 1.18   | 3.43   | 1.17   | 0.90   | 1.02   |     |
| cis-3-Hexenyl-alpha-methylbutyrate                     | 3.77   | 6.83   | 7.93   | 15.65  | 9.85   | 4.52   | 3.02   | 6.27   | 12.55  | 4.00   | 4.20   | 10.00  | 9.00   | 11.58  | 9.81   | 6.87   | 52.55  | 50.31  | 20.26  | 19.06  | 13.86  | 23.49  | 14.29  | 15.17  |     |
| Acetic acid, 2-phenylethyl ester                       | 2.18   | 5.01   | 4.32   | 8.23   | 4.72   | 6.24   | 5.70   | 9.24   | 7.26   | 0.57   | 0.48   | 0.62   | 0.56   | 0.64   | 0.63   | 0.44   | 1.22   | 1.08   | 0.55   | 0.62   | LOQ    | LOQ    | LOQ    | LOQ    |     |
| Benzoic acid, 2-hydroxy-, ethyl ester                  | LOD    | 1.23   | 1.77   | 3.53   | 4.51   | 1.86   | 1.36   | 3.12   | 0.91   | 169.49 | 140.46 | 308.20 | 277.38 | 387.22 | 385.61 | 269.93 | ####   | ####   | 742.69 | 743.77 | 758.74 | ####   | 904.58 | 739.37 |     |
| n-Valeric acid cis-3-hexenyl ester                     | LOD    | LOD    | LOD    | LOQ    | LOQ    | LOQ    | LOD    | LOD    | 0.93   | ####   | ####   | ####   | ####   | 2.55   | 3.18   | 2.22   | 55.74  | 80.11  | 78.44  | 72.84  | 151.42 | 145.15 | 117.35 | 89.47  |     |
| 2-Phenylethyl tiglate                                  | LOQ    | LOD    | LOD    | LOD    | LOD    | LOD    | LOD    | 0.87   | 0.24   | 0.12   | LOQ    | 0.29   | 0.26   | 1.11   | 0.96   | 0.67   | 0.14   | LOQ    | 0.12   | LOQ    | 0.12   | 0.12   | 0.12   | 0.12   |     |

|                                                                |            |            |            |            |            |            |            |            |           |            |            |            |            |            |            |                 |            |            |           |           |            |            |            |            |
|----------------------------------------------------------------|------------|------------|------------|------------|------------|------------|------------|------------|-----------|------------|------------|------------|------------|------------|------------|-----------------|------------|------------|-----------|-----------|------------|------------|------------|------------|
| Butyl benzoate                                                 | 0.12       | 0.12       | 0.12       | 4.57       | 2.17       | 2.85       | 1.53       | 0.86       | 7.09      | 73.9<br>5  | 57.9<br>5  | 66.2<br>5  | 59.6<br>3  | 6.00       | 3.69       | 2.59            | 37.5<br>7  | 44.8<br>4  | 32.9<br>7 | 39.4<br>7 | 53.0<br>6  | 96.6<br>8  | 59.2<br>9  | 57.4<br>4  |
| Hexanoic acid, 3-hexenyl ester, (Z)-                           | 4.61       | 7.60       | 5.89       | 16.3<br>3  | 4.34       | 12.4<br>6  | 8.35       | 9.18       | 15.3<br>8 | 354.<br>90 | 451.<br>61 | 473.<br>43 | 426.<br>09 | 483.<br>32 | 477.<br>81 | 334.<br>47      | 95.5<br>0  | 104.<br>38 | 74.0<br>0 | 87.2<br>7 | 217.<br>31 | 223.<br>90 | 162.<br>86 | 183.<br>38 |
| cis-3-Hexenyl cis-3-hexenoate                                  | 28.2<br>9  | 45.4<br>5  | 35.7<br>1  | 86.1<br>9  | 22.5<br>5  | 11.8<br>0  | 8.47       | 8.97       | 94.3<br>2 | 7.59       | 7.49       | 8.05       | 7.24       | 7.05       | 7.09       | 4.96            | 4.39       | 4.46       | 1.95      | 2.30      | 2.45       | 3.36       | 2.16       | 3.50       |
| 3-Hexen-1-ol, benzoate, (Z)-                                   | 180.<br>41 | 337.<br>92 | 293.<br>25 | 312.<br>97 | 121.<br>36 | 207.<br>09 | 161.<br>30 | 98.1<br>9  | 8.27      | 0.96       | 1.02       | 0.95       | 0.85       | 0.96       | 0.96       | 0.68            | 0.12       | 0.21       | 0.14      | 0.41      | 0.75       | 1.56       | 1.55       | 1.81       |
| beta-Myrcene                                                   | LOD        | 0.13      | LOQ        | 0.16       | 0.38       | 0.34       | 0.59       | 0.56       | 0.39<br>LO<br>Q | LOQ        | LOQ        | LOQ       | LOQ       | 0.24       | 0.18       | 0.18       | 0.16       |
| D-Limonene                                                     | LOD        | 0.20      | 0.19       | 0.27       | 0.29       | 0.26       | 0.02       | LOQ        | LO<br>Q         | 0.10       | 0.11       | LOQ       | LOQ       | LOQ        | LOQ        | LOQ        | LOQ        |
| Bicyclo [3.1.0] hex-2-ene, 2-methyl-5-(1-methylethyl)-         | LOD        | LOD        | LOD        | 5.96       | 5.06       | 3.67       | 2.40       | 9.16       | 0.50      | 6.67       | 5.20       | 8.85       | 7.97       | 12.5<br>8  | 12.3<br>7  | 8.66            | 0.29       | 0.48       | 0.35      | 0.40      | 4.74       | 2.30       | 1.19       | 1.25       |
| 3-Carene                                                       | LOD        | LOD        | LOD        | LOD        | 2.47       | LOD        | LOD        | 4.50       | 2.69      | LOQ        | LOQ        | LOQ        | LOQ        | LOD        | LOD        | LO<br>D         | 65.0<br>6  | 61.9<br>1  | 24.3<br>9 | 22.5<br>0 | 15.1<br>0  | 21.5<br>8  | 13.0<br>8  | 13.2<br>6  |
| alpha-Cubebene                                                 | LOQ        | LOQ        | LOQ        | LOD        | LOD        | LOD        | LOD        | LOD        | 0.03      | 22.7<br>8  | 26.4<br>2  | 52.1<br>8  | 46.9<br>6  | 80.3<br>5  | 71.6<br>5  | 50.1<br>6       | LOD        | LOD        | LOD       | LOQ       | 0.21       | LOD        | LOD        | LOQ        |
| Copaene                                                        | LOD        | 7.38      | 16.6<br>9  | 14.4<br>0  | 27.4<br>5  | 24.7<br>0  | 21.5<br>2  | 17.3<br>7  | 12.1<br>6       | 7.20       | 8.30       | 4.75      | 6.75      | 11.4<br>3  | 13.1<br>6  | 10.3<br>5  | 11.9<br>7  |
| Cyclohexane, 1-ethenyl-1-methyl-2,4-bis(1-methylethenyl)-, 1H- | 10.8<br>1  | 11.3<br>9  | 12.3<br>6  | 11.7<br>4  | LOD        | LOD        | LOD        | LOD        | 0.04      | 5.54       | 2.36       | 8.35       | 7.52       | 22.3<br>8  | 17.7<br>3  | 12.4<br>1       | 2.34       | 3.32       | 2.29      | 3.44      | 5.40       | 4.87       | 4.07       | 3.82       |
| Cycloprop[en]a zulene, 1a,2,3,4,4a,5,6,7b-octahydro            | LOD        | LOD        | LOD        | LOD        | LOD        | LOQ        | LOQ        | LOQ        | 0.23      | 4.10       | 5.89       | 11.7<br>8  | 10.6<br>0  | 7.78       | 9.87       | 6.91            | LOQ        | LOQ        | LOQ       | 0.12      | 0.51       | 0.50       | 0.49       | 0.50       |
| Caryophyllene                                                  | LOD        | LOD       | LOD        | LOD        | LOD        | LOD        | LOD        | LOD        | LO<br>D         | LOD        | LOD        | LOD       | LOD       | LOD        | LOD        | LOD        | LOD        |
| Aromandendrene                                                 | 0.39       | 0.36       | 0.43       | 0.37       | 12.8<br>6  | 0.34       | 0.28       | 0.29       | 38.6<br>6 | 32.2<br>8  | 24.4<br>9  | 40.9<br>0  | 36.8<br>1  | 37.5<br>1  | 33.0<br>0  | 23.1<br>0       | 150.<br>53 | 140.<br>20 | 52.0<br>6 | 51.3<br>1 | 32.8<br>8  | 88.5<br>3  | 50.4<br>4  | 58.2<br>7  |
| gamma-Muurolene                                                | 206.<br>05 | 189.<br>83 | 218.<br>36 | 190.<br>03 | 12.6<br>3  | 12.6<br>1  | 12.8<br>6  | 11.9<br>0  | 0.29      | 2.21       | 3.59       | 4.57       | 4.11       | 6.01       | 3.94       | 2.76            | LOD        | LOD        | LOD       | LOD       | LOD        | LOD        | LOD        | LOQ        |
| alpha-Guaiene                                                  | LOD        | 1.40      | 29.4<br>1  | 25.1<br>3  | 35.1<br>7  | 31.6<br>5  | 32.2<br>3  | 23.7<br>5  | 16.6<br>3       | 0.11       | 0.14       | LOD       | LOD       | 0.22       | 0.21       | 0.15       | 0.19       |
| alpha-Muurolene                                                | LOD        | LOD        | LOQ        | LOQ        | LOQ        | LOD        | 0.40       | 0.36       | #####     | 14.3<br>6  | 15.0<br>2  | 15.1<br>5  | 13.6<br>4  | 13.3<br>1  | 12.8<br>3  | 8.98            | 0.01       | 0.02       | 0.01      | 0.03      | 0.44       | 0.38       | 0.31       | 0.22       |
| alpha-Farnesene                                                | 503.<br>17 | 508.<br>11 | 441.<br>43 | 613.<br>10 | 324.<br>85 | 385.<br>18 | 231.<br>06 | 341.<br>32 | 10.5<br>1 | 73.3<br>4  | 497.<br>59 | #####      | 994.<br>76 | 630.<br>86 | 613.<br>08 | 429.<br>15      | 26.3<br>4  | 25.4<br>5  | 9.11      | 8.24      | 5.53       | 11.6<br>2  | 7.42       | 6.93       |
| Naphthalene, 1,2,3,5,6,8a-hexahydro                            | 3.15       | 2.95       | 2.88       | 3.30       | 3.52       | 3.33       | 3.66       | 3.61       | 0.51      | 0.33       | 0.31       | 0.30       | 0.27       | 0.30       | LOD        | LO<br>D         | 1.80       | 2.23       | 1.17      | 1.25      | 1.40       | 1.86       | 1.23       | 0.87       |

|                                                                   |            |            |            |            |            |            |            |            |           |            |            |            |            |            |            |            |      |           |      |      |      |           |           |           |
|-------------------------------------------------------------------|------------|------------|------------|------------|------------|------------|------------|------------|-----------|------------|------------|------------|------------|------------|------------|------------|------|-----------|------|------|------|-----------|-----------|-----------|
| Cubenene                                                          | 2.04       | 1.94       | 1.89       | 2.12       | 2.29       | 2.19       | 2.39       | 2.39       | 41.1<br>3 | LOQ        | LOQ        | LOQ        | LOQ        | LOQ        | LOQ        | LO<br>Q    | 1.06 | 0.81      | 0.35 | 0.31 | 7.30 | 2.12      | 1.45      | 1.68      |
| Naphthalene,<br>1,2,4a,5,6,8a-<br>hexahydro-4,7                   | LOD        | LOD        | LOD        | LOD        | 12.2<br>6  | 11.1<br>1  | 12.6<br>1  | 11.7<br>5  | 0.20      | 632.<br>76 | 727.<br>72 | 633.<br>41 | 570.<br>07 | 576.<br>80 | 601.<br>61 | 421.<br>13 | LOQ  | LOQ       | LOQ  | LOQ  | 0.44 | 0.38      | 0.31      | 0.22      |
| Bisabolol                                                         | LOD        | 4.64      | 25.3<br>5  | 19.6<br>3  | 54.4<br>3  | 48.9<br>9  | 51.4<br>0  | 42.1<br>5  | 29.5<br>0  | 1.29 | 1.82      | 0.94 | 1.05 | 1.19 | 2.02      | 1.28      | 1.49      |
| 1,6,10-<br>Dodecatrien-<br>3-ol, 3,7,11-<br>trimethyl-,<br>(E)-   | ####<br>## | 169.<br>86 | 146.<br>93 | 260.<br>18 | 126.<br>16 | 104.<br>79 | 81.2<br>4  | 50.7<br>9  | 0.00      | 1.46       | 1.94       | 1.28       | 1.15       | 1.44       | 1.27       | 0.89       | LOD  | LOD       | LOQ  | LOQ  | LOQ  | LOD       | LOQ       | LOQ       |
| tau-Cadinol                                                       | LOD        | LOD        | LOD        | LOQ        | LOQ        | LOQ        | LOD        | LOD        | 1.03      | 1.09       | 1.17       | 1.99       | 1.79       | 0.85       | 0.69       | 0.48       | 0.26 | 0.26      | 0.29 | 0.29 | 0.29 | 0.28      | 0.29      | 0.29      |
| Benzene, 1-<br>isocyano-3-<br>methyl-                             | 0.31       | 0.31       | 0.31       | 0.31       | 0.31       | 0.31       | 0.31       | 0.31       | 1.03      | 151.<br>50 | 118.<br>99 | 287.<br>29 | 258.<br>56 | 337.<br>52 | 259.<br>27 | 181.<br>49 | 0.25 | 0.24      | 0.28 | 0.27 | 0.28 | 0.29      | 0.30      | 0.30      |
| 1H-Tetrazol-<br>5-amine                                           | 0.31       | 0.31       | 0.31       | 0.30       | 0.31       | 0.31       | 0.31       | 0.30       | 18.4<br>9 | 2.13       | 2.46       | 9.75       | 8.77       | 4.62       | 2.91       | 2.03       | 6.81 | 7.04      | 5.19 | 4.46 | 4.52 | 9.52      | 7.91      | 7.29      |
| indole                                                            | 9.23       | 9.68       | 7.77       | 12.2<br>7  | 2.10       | 2.49       | 1.41       | 2.20       | 0.99      | LOD        | LOD        | LOD        | LOD        | LOD        | LOD        | LO<br>D    | 8.80 | 10.8<br>1 | 5.71 | 6.68 | 7.23 | 14.9<br>5 | 10.2<br>4 | 12.0<br>5 |
| s-<br>Triazolo[4,3-<br>a] pyridine,<br>3,5,7-<br>trimethyl-<br>3- | 0.31       | 0.31       | 0.31       | 0.31       | 0.31       | 0.31       | 0.31       | 0.31       | 0.25      | 0.27       | 0.33       | 0.27       | 0.24       | 0.21       | 0.20       | 0.14       | 0.31 | 0.31      | 0.31 | 0.31 | 0.26 | 0.27      | 0.28      | 0.26      |
| Pyridinecarbo<br>nitrile, 1,4-<br>dihydro-1-<br>methyl-           | LOD        | 0.15       | 0.17       | 0.13       | 0.17       | 0.16       | 0.17       | 0.14       | 79.2<br>0 | 37.0<br>7  | 34.1<br>5  | 38.3<br>5  | 34.5<br>1  | 42.9<br>4  | 40.2<br>1  | 28.1<br>5  | 6.81 | 7.04      | 5.19 | 4.46 | 4.52 | 9.52      | 7.91      | 7.29      |
| Butanoic acid,<br>3-hexenyl<br>ester, (E)-                        | 23.7<br>6  | 50.8<br>5  | 42.1<br>5  | 92.4<br>6  | 33.6<br>2  | 14.8<br>9  | 11.1<br>5  | 29.1<br>6  | 0.23      | ####<br>## | ####<br>## | ####<br>## | ####<br>## | 92.1<br>3  | 8.23       | 5.76       | 3.72 | 5.38      | 3.93 | 6.34 | 8.97 | 13.4<br>0 | 11.7<br>4 | 12.6<br>6 |
| 5-Hexen-3-<br>one                                                 | LOD        | LOD        | LOD        | LOQ        | LOQ        | LOQ        | LOD        | 0.11       | 1.12      | 0.39       | 0.56       | 0.57       | 0.51       | 0.57       | 0.58       | 0.40       | 0.58 | 0.62      | 0.43 | 0.46 | 0.80 | 1.08      | 1.03      | LOD       |
| Cyclohexene,<br>3-methyl-6-(1-<br>methylethylid<br>ene)-          | 146.<br>22 | 285.<br>04 | 329.<br>04 | 377.<br>97 | 208.<br>98 | 237.<br>98 | 150.<br>46 | 237.<br>38 | 1.56      | 0.46       | 0.14       | 0.63       | 0.57       | 1.10       | 0.96       | 0.67       | 9.51 | 12.8<br>6 | 6.59 | 6.58 | 2.41 | 1.52      | 2.02      | 0.73      |
| (E)-4,8-<br>Dimethylnona<br>-1,3,7-triene                         | 0.47       | 0.66       | 1.08       | 1.37       | 1.03       | 0.80       | 0.39       | 0.70       | 1.71      | 2.46       | 2.23       | 5.11       | 4.60       | 7.63       | 6.81       | 4.77       | 0.43 | 0.57      | 0.36 | 0.62 | 1.53 | LOD       | LOQ       | LOD       |
| Cyclohexane,<br>1-ethenyl-1-<br>methyl                            | 0.51       | 0.44       | 0.58       | 0.38       | 0.44       | 0.43       | 0.43       | 0.39       | 12.3<br>8 | 8.77       | 7.93       | 14.3<br>1  | 12.8<br>8  | 16.8<br>7  | 16.5<br>5  | 11.5<br>9  | 7.57 | 8.45      | 5.54 | 7.06 | 9.63 | 14.9<br>6 | 11.5<br>1 | 13.7<br>0 |
| 3,7,11,11-<br>Tetramethylbi<br>cyclo [8.1.0]-<br>2,6-diene        | 3.71       | 8.82       | 7.54       | 10.5<br>5  | 5.12       | 11.2<br>9  | 4.23       | 5.90       | 12.3<br>8 | 6.94       | 7.42       | 7.34       | 6.61       | 7.04       | 7.52       | 5.26       | 1.43 | 1.75      | 1.18 | 1.53 | 1.87 | 2.98      | 2.38      | 2.22      |
| methyl-3-<br>methylenetric                                        | 3.71       | 4.31       | 4.51       | 4.55       | 4.06       | 4.39       | 3.88       | 3.87       | 7.68      | 5.09       | 4.72       | 8.20       | 7.38       | 9.35       | 9.28       | 6.50       | LOD  | LOQ       | LOQ  | LOQ  | 0.12 | LOQ       | LOQ       | 0.11      |

**Table S3 The qualitative and quantitative analysis of volatile components of the tea dhool**

| No. | Compounds                         | B. Identification |    |     | Linear Equations  | R      | Linear Range(μg/L) | LOD (μ | LOQ (μ |
|-----|-----------------------------------|-------------------|----|-----|-------------------|--------|--------------------|--------|--------|
|     |                                   | Method            |    |     |                   |        |                    | g/L)   | g/L)   |
| C19 | Cis-3-Hexenyl Salicylate          | MS                | RI |     | Y=94.6014x-10.456 | 0.9923 | 1.995-100.000      | 0.0006 | 0.0389 |
| C2  | Epi-A-Cadinol                     | MS                | RI |     | Y=38.0006x-0.3725 | 0.999  | 1.805-401.000      | 0.0009 | 0.0476 |
| C2  | Geraniol                          | MS                | RI |     | Y=38.0006x-0.3725 | 0.999  | 1.805-401.000      | 0.0009 | 0.0476 |
| C2  | Methyl Anthranilate               | MS                | RI | Std | Y=38.0006x-0.3725 | 0.999  | 1.805-401.000      | 0.0009 | 0.0476 |
| C20 | (3z)-Hexenyl Butanoate            | MS                | RI | Std | Y=0.0717x+20.317  | 0.9983 | 2.001-20010.000    | 0.0362 | 0.0961 |
| C20 | Cis-3-Hexenyl Cis-3-Hexenoate     | MS                | RI |     | Y=0.0717x+20.317  | 0.9983 | 2.001-20010.000    | 0.0362 | 0.0961 |
| C20 | Cadinadiene                       | MS                |    |     | Y=0.0717x+20.318  | 0.9983 | 2.001-20010.001    | 0.0362 | 0.0961 |
| C20 | Isoprppylcyclohexane              | MS                |    |     | Y=0.0717x+20.319  | 0.9983 | 2.001-20010.002    | 0.0362 | 0.0961 |
| C21 | Cis-3-Hexenyl Benzoate            | MS                | RI | Std | Y=15.3401x+0.1547 | 0.9625 | 2.013-10065.002    | 0.0319 | 0.0074 |
| C21 | A-Cadinene                        | MS                |    |     | Y=15.3401x+0.1548 | 0.9625 | 2.013-10065.003    | 0.0319 | 0.0074 |
| C21 | Tetradecane                       | MS                |    |     | Y=15.3401x+0.1549 | 0.9625 | 2.013-10065.004    | 0.0319 | 0.0074 |
| C22 | Cis-3-Hexenyl Isovalerate         | MS                | RI | Std | Y=0.002x+0.163    | 0.9993 | 2.024-202.400      | 0.0064 | 0.9436 |
| C22 | Hexanoic Acid, 3-Hexenyl Ester    | MS                | RI |     | Y=0.002x+0.164    | 0.9993 | 2.024-202.401      | 0.0064 | 0.9436 |
| C22 | 3-Hexenyl Benzoate                | MS                | RI |     | Y=0.002x+0.165    | 0.9993 | 2.024-202.402      | 0.0064 | 0.9436 |
| C23 | Acetic Acid, Phenylmethyl Ester   | MS                | RI | Std | Y=0.3401x+0.1546  | 0.9921 | 2.042-25552.500    | 0.0050 | 0.5229 |
| C24 | Geranyl Acetate                   | MS                | RI | Std | Y=10.5408x+0.6417 | 0.9983 | 2.011-2513.750     | 0.0137 | 1.1917 |
| C24 | (E)-3,7-Dimethyl-1,3,6-Octatriene | MS                |    |     | Y=10.5408x+0.6418 | 0.9983 | 2.011-2513.751     | 0.0137 | 1.1917 |
| C24 | Ocimene                           | MS                | RI |     | Y=10.5408x+0.6419 | 0.9983 | 2.011-2513.752     | 0.0137 | 1.1917 |
| C24 | Ylangene                          | MS                | RI |     | Y=10.5408x+0.6420 | 0.9983 | 2.011-2513.753     | 0.0137 | 1.1917 |
| C25 | (E)-3-Hexenyl Acetate             | MS                | RI | Std | Y=0.0655x+6.3373  | 0.9983 | 10.020-5010.000    | 0.0025 | 0.0019 |
| C25 | (Z)-3-Hexenyl Isobutanoate        | MS                | RI |     | Y=0.0655x+6.3374  | 0.9983 | 10.020-5010.001    | 0.0025 | 0.0019 |

|     |                                |    |    |     |                     |        |                 |        |        |
|-----|--------------------------------|----|----|-----|---------------------|--------|-----------------|--------|--------|
| C26 | Indole                         | MS | RI | Std | $Y=3.3042x+8.6759$  | 0.9958 | 2.001-20010.000 | 0.0304 | 0.0186 |
| C27 | B-Myrcene                      | MS | RI | Std | $Y=0.081x+0.930$    | 0.9986 | 2.023-101.150   | 0.0026 | 0.0033 |
| C27 | A-Copaene                      | MS | RI |     | $Y=0.081x+0.931$    | 0.9986 | 2.023-101.151   | 0.0026 | 0.0033 |
| C27 | (-)-Beta-Elemene               | MS | RI |     | $Y=0.081x+0.932$    | 0.9986 | 2.023-101.152   | 0.0026 | 0.0033 |
| C27 | $\Gamma$ -Cadinene             | MS | RI |     | $Y=0.081x+0.933$    | 0.9986 | 2.023-101.153   | 0.0026 | 0.0033 |
| C27 | $\Delta$ -Cadinene             | MS | RI |     | $Y=0.081x+0.934$    | 0.9986 | 2.023-101.154   | 0.0026 | 0.0033 |
| C28 | (Z)-3-Hexenyl-2-Methylbutyrate | MS | RI | Std | $Y=0.0003x-0.1845$  | 0.9958 | 2.013-10065.000 | 0.0319 | 0.0032 |
| C3  | Benzyl Alcohol                 | MS | RI | Std | $Y=10.0408x+36.417$ | 0.9993 | 2.003-20030.001 | 0.1684 | 0.0044 |
| C4  | 2-Methylnaphthalene            | MS | RI | Std | $Y=0.014x+18.96$    | 0.995  | 2.033-20330.001 | 0.2889 | 0.1262 |
| C5  | D-Limonene                     | MS | RI | Std | $Y=26.1214x+0.4572$ | 0.9951 | 2.013-50.325    | 0.0010 | 0.0030 |
| C5  | Germacrene D                   | MS | RI |     | $Y=26.1214x+0.4573$ | 0.9951 | 2.013-50.326    | 0.0010 | 0.0030 |
| C5  | A-Zingiberene                  | MS | RI |     | $Y=26.1214x+0.4574$ | 0.9951 | 2.013-50.327    | 0.0010 | 0.0030 |
| C5  | A-Murolene                     | MS | RI |     | $Y=26.1214x+0.4575$ | 0.9951 | 2.013-50.328    | 0.0010 | 0.0030 |
| C5  | A-Farnesene                    | MS | RI |     | $Y=26.1214x+0.4576$ | 0.9951 | 2.013-50.329    | 0.0010 | 0.0030 |
| C5  | 1-Methylnaphthalene            | MS |    |     | $Y=26.1214x+0.4577$ | 0.9951 | 2.013-50.330    | 0.0010 | 0.0030 |
| C6  | (Z)-3-Hexen-1-ol               | MS | RI | Std | $Y=0.9029x-0.1055$  | 0.9983 | 2.039-1274.375  | 0.0016 | 0.0996 |
| C7  | B-Cyclocitral                  | MS | RI | Std | $Y=60.6010x+0.0181$ | 0.9958 | 1.986-198.600   | 0.0010 | 0.0027 |
| C8  | B-Caryophyllene                | MS | RI | Std | $Y=3.3012x+0.1284$  | 0.9911 | 2.014-2517.500  | 0.0363 | 0.0066 |
| C8  | Aromadendrene,                 | MS | RI |     | $Y=3.3012x+0.1285$  | 0.9911 | 2.014-2517.501  | 0.0363 | 0.0066 |
| C8  | Humulene                       | MS | RI |     | $Y=3.3012x+0.1286$  | 0.9911 | 2.014-2517.502  | 0.0363 | 0.0066 |
| C8  | (E)-B-Farnesene                | MS | RI |     | $Y=3.3012x+0.1287$  | 0.9911 | 2.014-2517.503  | 0.0363 | 0.0066 |
| C8  | $\Gamma$ -Murolene             | MS | RI |     | $Y=3.3012x+0.1288$  | 0.9911 | 2.014-2517.504  | 0.0363 | 0.0066 |
| C8  | B-Selinene                     | MS | RI |     | $Y=3.3012x+0.1289$  | 0.9911 | 2.014-2517.505  | 0.0363 | 0.0066 |
| C9  | Benzaldehyde                   | MS | RI | Std | $Y=1.7023x-0.210$   | 0.9954 | 2.032-2540.000  | 0.0022 | 0.1063 |
| C1  | (E)-Nerolidol                  | MS | RI | Std | $Y=0.0686x+78.41$   | 0.9958 | 2.013-10065.001 | 0.0319 | 0.8736 |
| C10 | Methyl Benzoate                | MS | RI | Std | $Y=5.2054x-3.3047$  | 0.9568 | 2.035-40700.000 | 0.3249 | 0.0276 |

|     |                                          |    |    |     |                   |        |                   |        |        |
|-----|------------------------------------------|----|----|-----|-------------------|--------|-------------------|--------|--------|
| C11 | Acetic Acid, 2-Phenylethyl Ester         | MS | RI |     | Y=0.0003x+0.0624  | 0.9911 | 2.011-5027.501    | 0.0127 | 0.0145 |
| C11 | Benzoic Acid, Ethyl Ester                | MS | RI | Std | Y=0.0003x+0.0624  | 0.9911 | 2.011-5027.501    | 0.0127 | 0.0145 |
| C11 | Butyl Benzoate                           | MS | RI |     | Y=0.0003x+0.0624  | 0.9911 | 2.011-5027.501    | 0.0127 | 0.0145 |
| C11 | Benzyl Benzoate                          | MS | RI |     | Y=0.0003x+0.0624  | 0.9911 | 2.011-5027.501    | 0.0127 | 0.0145 |
| C12 | N-Hexyl Benzoate                         | MS | RI | Std | Y=0.4553x+0.0773  | 0.9994 | 10.000-10098.000  | 0.0461 | 0.1392 |
| C13 | Phenylethyl Alcohol                      | MS | RI | Std | Y=13.709x-18.389  | 0.9923 | 1.996-79920.000   | 0.3923 | 0.0067 |
| C13 | Benzene Acetonitrile                     | MS | RI |     | Y=13.709x-18.389  | 0.9923 | 1.996-79920.000   | 0.3923 | 0.0067 |
| C14 | Butanoic Acid, Phenylmethyl Ester        | MS | RI | Std | Y=2.8403x-0.1845  | 0.994  | 2.011-402.200     | 0.0011 | 0.0147 |
| C15 | Eugenol                                  | MS | RI | Std | Y=13.409x-0.2455  | 0.9951 | 2.004-400.800     | 0.0030 | 0.0940 |
| C15 | (1r)-1a-Isopropyl-6-Octahydronaphthalene | MS |    |     | Y=13.409x-0.2455  | 0.9951 | 2.004-400.800     | 0.0030 | 0.0940 |
| C15 | 1-Methoxy-4-Benzene                      | MS |    |     | Y=13.409x-0.2455  | 0.9951 | 2.004-400.800     | 0.0030 | 0.0940 |
| C16 | Linalool Oxide I                         | MS | RI |     | Y=0.4311x-0.1321  | 0.9981 | 10.000-100098.000 | 0.0471 | 0.1421 |
| C16 | Linalool                                 | MS | RI | Std | Y=0.4311x-0.1321  | 0.9981 | 10.000-100098.000 | 0.0471 | 0.1421 |
| C16 | Cubebene                                 | MS |    |     | Y=0.4311x-0.1321  | 0.9981 | 10.000-100098.000 | 0.0471 | 0.1421 |
| C17 | Linalool Oxide Ii                        | MS | RI |     | Y=3.5019x+0.1465  | 0.9986 | 10.000-100098.001 | 0.0471 | 0.0089 |
| C17 |                                          | MS | RI | Std | Y=3.5019x+0.1465  | 0.9986 | 10.000-100098.001 | 0.0471 | 0.0089 |
| C17 | Cis-Muurolo-4(14),5-Diene                | MS |    |     | Y=3.5019x+0.1465  | 0.9986 | 10.000-100098.001 | 0.0471 | 0.0089 |
| C18 | Methyl Salicylate                        | MS | RI | Std | Y=3.9123x-0.0254  | 0.995  | 1.999-199.900     | 0.0083 | 0.1421 |
| C18 | Epi-Bicyclosquiphellandrene              | MS |    |     | Y=3.9123x-0.0254  | 0.995  | 1.999-199.900     | 0.0083 | 0.1421 |
| C19 | Benzoic Acid, 2-Hydroxy-, Ethyl Ester    | MS | RI | Std | Y=94.6014x-10.456 | 0.9923 | 1.995-100.000     | 0.0006 | 0.0389 |

Note. b. Method of identification: MS, Comparison of mass spectra with MS libraries and retention times. RI, retention index. Std, confirmed by authentic standards. LOD: Limit of detection. LOQ: Limit of quantitation.

**Table S4 The quantitative results of volatile constituents of jasmine tea**

| Compounds | The quantitative of volatile components of the new scenting process jasmine flower |      |      |      |      |       |       |       |          | The quantitative of volatile components of the traditional scenting process tea base |      |      |      |      |       |       |       |          |
|-----------|------------------------------------------------------------------------------------|------|------|------|------|-------|-------|-------|----------|--------------------------------------------------------------------------------------|------|------|------|------|-------|-------|-------|----------|
|           | 0.00                                                                               | 2.00 | 4.00 | 6.00 | 8.00 | 10.00 | 12.00 | 14.00 | Finished | 0.00                                                                                 | 2.00 | 4.00 | 6.00 | 8.00 | 10.00 | 12.00 | 14.00 | Finished |

|                                              |             |             |             |             |             |             |             |             |         |             |             |             |             |             |             |             |             |         |
|----------------------------------------------|-------------|-------------|-------------|-------------|-------------|-------------|-------------|-------------|---------|-------------|-------------|-------------|-------------|-------------|-------------|-------------|-------------|---------|
| (-)-beta-Elemene                             | 35.70       | 57.59       | 32.68       | 46.28       | 83.30       | 36.14       | 57.76       | 46.16       | 21.69   | 56.3<br>1   | 12.38       | 20.77       | 23.54       | 42.04       | 42.88       | 62.25       | 36.07       | 39.44   |
| (1R)-1α-octahydronaphthalene                 | LOD         | 0.16        | 0.05        | 0.12        | 0.21        | LOD         | 0.14        | LOD         | 0.10    | 0.11        | LOD         | LOD         | LOD         | LOD         | 0.12        | 0.15        | 0.11        | 0.14    |
| (3Z)-Hexenyl butanoate                       | 618.86      | 201.67      | 556.65      | 455.89      | 820.61      | 582.48      | 728.11      | 608.61      | 552.60  | 327.<br>86  | 351.82      | 177.37      | 196.32      | 301.61      | 190.40      | 288.79      | 231.06      | 262.72  |
| (E)-3,7-Dimethyl-1,3,6-octatriene            | 0.23        | 0.53        | 0.36        | 1.03        | 1.85        | 1.06        | 0.59        | 0.83        | 0.59    | 0.42        | LOD         | LOQ         | 1.34        | 1.68        | 0.80        | 1.50        | 0.25        | 1.54    |
| (E)-3-Hexenyl acetate                        | 452.88      | 254.78      | 352.41      | 843.46      | 1518.2<br>2 | 1104.0<br>9 | 863.01      | 1375.2<br>8 | 1224.91 | 402.<br>56  | 297.87      | 422.46      | 693.52      | 1177.8<br>7 | 1323.4<br>3 | 2038.5<br>5 | 1203.2<br>5 | 1832.35 |
| (E)-Nerolidol                                | LOD         | 3.70        | 1.03        | 2.30        | 4.14        | 0.44        | 12.04       | 3.40        | 5.60    | 0.73        | 0.64        | 1.72        | 1.24        | 1.45        | 6.31        | 2.77        | 2.69        | 5.70    |
| (E)-β-Farnesene                              | 0.68        | 1.16        | 0.63        | 1.00        | 1.80        | LOD         | 1.14        | 0.98        | 0.61    | 0.95        | 0.47        | 0.71        | 0.71        | 0.88        | 0.83        | 1.22        | 0.84        | 0.64    |
| (Z)-3-Hexen-1-ol                             | 13.59       | 33.88       | 14.19       | 78.42       | 141.16      | 86.46       | 77.86       | 146.00      | 121.00  | 15.9<br>7   | LOD         | 47.92       | 89.60       | 124.54      | 218.75      | 346.82      | 233.23      | 306.30  |
| (Z)-3-Hexenyl isobutanoate                   | 0.15        | 2.61        | LOD         | LOD         | LOD         | LOQ         | 1.09        | 0.36        | 0.06    | LOD         | LOD         | LOD         | LOD         | LOD         | LOQ         | LOQ         | LOQ         | 0.57    |
| (Z)-3-hexenyl-2-methylbutyrate               | 1.39        | 1.21        | 1.25        | 1.30        | 2.34        | 1.62        | 3.51        | 2.23        | 2.12    | 1.02        | 0.80        | 0.90        | 0.74        | 1.20        | 1.36        | 1.85        | 1.46        | 1.64    |
| 1-Methoxy-4-(1-propenyl)-benzene             | 0.19        | 0.76        | 0.46        | 1.10        | 1.98        | 0.74        | 0.29        | 0.79        | 0.12    | 0.79        | 0.53        | 0.38        | 0.22        | 0.19        | 0.37        | 0.82        | 0.68        | 0.07    |
| 1-methylnaphthalene                          | LOD         | 0.13        | 0.08        | 0.12        | 0.22        | 0.20        | LOD         | 0.10        | 0.01    | LOD         | LOD         | LOQ         | LOQ         | 0.15        | 0.14        | 0.18        | LOD         | 0.05    |
| 2-methylnaphthalene                          | LOD         | LOD         | LOD         | LOD         | LOD         | LOD         | LOQ         | LOQ         | 0.05    | LOD         | LOD         | LOD         | LOD         | LOQ         | LOD         | LOQ         | LOQ         | 0.04    |
| 3-Hexenyl benzoate                           | 0.48        | 1.83        | 0.75        | 1.38        | 2.48        | 0.81        | 1.96        | 1.68        | 1.75    | 0.87        | 0.78        | 1.07        | 0.99        | 1.21        | 1.70        | 1.86        | 1.65        | 1.90    |
| Acetic acid, 2-phenylethyl ester             | 0.11        | 0.23        | 0.09        | 0.18        | 0.33        | 0.13        | 0.16        | 0.17        | 1.02    | 0.71        | 0.57        | 0.96        | 1.05        | 1.35        | 1.19        | 2.12        | 1.40        | 1.92    |
| Acetic acid, phenylmethyl ester              | 717.17      | 1364.9<br>6 | 1003.3<br>3 | 1855.4<br>2 | 3339.7<br>6 | 1199.7<br>6 | 967.47      | 1505.6<br>3 | 1139.06 | 1267<br>.50 | 965.34      | 1223.9<br>1 | 899.31      | 1053.6<br>7 | 984.82      | 1398.9<br>5 | 1107.7<br>1 | 1124.57 |
| Aromadendrene, bate-Copaene                  | LOD         | 0.35        | 0.15        | 0.34        | 0.62        | 0.31        | LOQ         | 0.29        | 0.22    | 0.28        | 0.17        | 0.18        | LOD         | 0.28        | 0.25        | 0.39        | 0.23        | 0.08    |
| Benzaldehyde                                 | 1.15        | 2.10        | 1.07        | 0.33        | 0.60        | 0.18        | 0.32        | 0.30        | 0.29    | 0.20        | 0.20        | 0.17        | 0.23        | 1.56        | 1.61        | 2.28        | 1.41        | 0.37    |
| Benzaldehyde                                 | 1.02        | 2.34        | 0.75        | 2.27        | 4.09        | 0.32        | 0.65        | 0.31        | 1.68    | 2.92        | 1.56        | 1.52        | 0.88        | 1.09        | 0.29        | 1.85        | 1.79        | 2.28    |
| benzene acetonitrile                         | 397.92      | 574.67      | 431.89      | 659.04      | 1186.2<br>7 | 553.46      | 406.73      | 610.58      | 497.69  | 511.<br>28  | 391.09      | 459.94      | 371.83      | 434.64      | 464.48      | 549.84      | 294.89      | 449.16  |
| Benzoic acid, 2-(methylamino)-, methyl ester | 0.28        | 1.42        | 0.43        | 1.09        | 1.96        | 0.63        | 0.84        | 1.32        | 1.09    | 0.64        | 0.41        | 1.17        | 1.08        | 1.39        | 2.42        | 2.73        | 2.71        | 3.02    |
| Benzoic acid, ethyl ester                    | LOD         | 0.06        | 0.53        | 0.29        | 0.53        | 0.18        | 0.81        | 1.01        | 0.94    | LOD         | 1.05        | LOD         | LOD         | 0.36        | 1.15        | 1.47        | 1.83        | 0.90    |
| Benzoic acid, ethyl ester                    | 0.77        | 3.69        | 1.20        | 5.90        | 10.63       | 3.13        | 4.41        | 4.20        | 3.93    | 1.43        | 0.34        | 4.86        | 4.09        | 4.58        | 4.05        | 6.10        | 5.89        | 8.19    |
| benzyl alcohol                               | 1330.6<br>2 | 3714.2<br>9 | 934.66      | 3476.5<br>0 | 6257.7<br>0 | 2510.5<br>2 | 2343.0<br>3 | 2951.7<br>7 | 33.05   | 2773<br>.99 | 1563.7<br>2 | 3976.7<br>9 | 3891.1<br>9 | 4156.9<br>8 | 6064.2<br>6 | 9982.2<br>5 | 6511.6<br>8 | 34.80   |
| Benzyl benzoate                              | LOQ         | LOD         | 0.26        | LOD         | LOD         | 0.30        | 1.29        | 0.48        | 0.83    | LOD         | 0.87        | 2.15        | 0.29        | 0.63        | 1.09        | 2.82        | 2.40        | 0.73    |
| Butanoic acid, phenylmethyl ester            | 0.48        | 1.80        | 1.18        | 1.89        | 3.39        | 1.07        | 2.49        | 1.86        | 1.56    | 0.65        | 0.85        | 1.47        | 0.95        | 1.30        | 1.44        | 1.70        | 1.91        | 1.55    |
| Butyl benzoate                               | LOD         | 0.39        | 0.17        | 0.30        | 0.54        | 0.19        | 0.54        | 0.34        | 0.39    | 0.31        | 0.18        | 0.35        | 0.28        | 0.32        | 0.39        | 0.46        | 0.37        | 0.40    |

|                                               |             |             |        |             |             |             |        |        |        |             |        |             |        |        |        |             |        |        |
|-----------------------------------------------|-------------|-------------|--------|-------------|-------------|-------------|--------|--------|--------|-------------|--------|-------------|--------|--------|--------|-------------|--------|--------|
| cis-3-Hexenyl benzoate                        | 22.24       | 100.63      | 40.82  | 74.67       | 134.40      | 40.31       | 100.72 | 82.37  | 80.34  | 47.3<br>3   | 42.94  | 59.46       | 51.22  | 61.93  | 80.60  | 84.16       | 72.56  | 86.17  |
| Cis-3-Hexenyl cis-3-hexenoate                 | 213.31      | 107.01      | 271.59 | 217.78      | 392.01      | 209.03      | 392.72 | 284.56 | 203.31 | 105.<br>46  | 196.67 | 82.32       | 99.44  | 134.35 | 82.87  | 114.78      | 96.63  | 113.68 |
| cis-3-Hexenyl isovalerate                     | 10.64       | 11.38       | 18.46  | 14.97       | 26.95       | 17.11       | 100.82 | 37.73  | 69.48  | 8.36        | 9.52   | 10.66       | 13.12  | 11.10  | 46.11  | 65.14       | 54.82  | 55.85  |
| cis-3-Hexenyl salicylate                      | LOD         | LOD         | LOD    | LOD         | LOD         | LOD         | LOD    | LOD    | 0.01   | 0.51        | LOD    | LOD         | LOD    | LOD    | LOQ    | LOD         | LOD    | 0.01   |
| cis-Muurolo-4(14),5-diene                     | 2.41        | 4.45        | 1.40   | 3.26        | 5.87        | 2.58        | 3.79   | 3.36   | 3.57   | 2.59        | 1.32   | 0.63        | 2.65   | 3.49   | 3.57   | 5.51        | 1.97   | 5.07   |
| Cubebene                                      | LOD         | LOD         | LOD    | LOD         | 0.00        | LOD         | LOQ    | LOQ    | 0.00   | LOD         | LOD    | LOQ         | LOD    | LOQ    | LOD    | 0.11        | LOD    | 0.08   |
| D-Limonene                                    | 0.23        | 0.19        | 0.15   | 0.37        | 0.67        | 0.29        | 0.19   | 0.25   | 0.22   | 0.28        | LOD    | LOQ         | 0.47   | 0.50   | 0.27   | 0.45        | 0.18   | 0.44   |
| bicyclosiquiphellandrene                      | 1.37        | 4.64        | 1.67   | 4.94        | 8.89        | 2.10        | 6.08   | 3.50   | 2.63   | 3.09        | 1.64   | 1.29        | 2.11   | 3.24   | 4.30   | 7.51        | 17.25  | 4.73   |
| epi- $\alpha$ -Cadinol (syn. $\tau$ -cadinol) | LOQ         | 11.06       | 0.35   | 1.98        | 3.57        | 2.13        | 4.54   | 2.16   | 2.80   | 4.23        | 0.58   | 0.33        | 0.82   | 2.04   | 5.52   | 3.88        | 5.06   | 5.00   |
| Eugenol                                       | 1.57        | 2.36        | 1.41   | 2.78        | 5.00        | 3.08        | 2.55   | 2.53   | 2.84   | 1.07        | 0.94   | 2.15        | 3.93   | 3.95   | 10.74  | 5.45        | 7.67   | 9.40   |
| geraniol                                      | 0.35        | 1.08        | 0.55   | 2.28        | 4.10        | 1.33        | 1.28   | 1.25   | 0.33   | 0.13        | 0.14   | 0.11        | LOD    | 0.11   | 0.30   | 0.25        | 0.34   | 0.36   |
| Geranyl acetate                               | 2.24        | 1.77        | 2.36   | 2.81        | 5.06        | 1.70        | 13.18  | 4.44   | 8.94   | 1.63        | 2.53   | 2.68        | 2.57   | 5.02   | 7.60   | 9.37        | 7.65   | 9.13   |
| Germacrene D                                  | 4.10        | 9.73        | 3.11   | 4.15        | 7.48        | 2.20        | 8.06   | 4.35   | 1.59   | 4.71        | 2.03   | 2.94        | LOQ    | 1.98   | 4.15   | 6.71        | 5.02   | 3.52   |
| Hexanoic acid, 3-hexenyl ester                | 35.08       | 13.10       | 35.95  | 22.56       | 40.61       | 25.05       | 44.05  | 30.98  | 23.89  | 13.3<br>8   | 21.73  | 7.31        | 6.12   | 9.28   | 5.55   | 9.26        | 7.81   | 8.91   |
| Humulene                                      | 33.88       | 52.72       | 27.00  | 27.17       | 48.90       | 23.20       | 42.99  | 27.01  | 14.08  | 49.0<br>4   | 19.60  | 25.41       | 16.01  | 26.13  | 28.34  | 42.11       | 25.66  | 22.80  |
| Indole                                        | 56.01       | 254.91      | 85.35  | 221.48      | 398.66      | 122.97      | 181.31 | 199.68 | 178.04 | 148.<br>86  | 100.67 | 206.24      | 158.31 | 180.66 | 221.96 | 262.95      | 240.79 | 210.50 |
| isopropylcyclohexane                          | 34.26       | 82.77       | 57.26  | 92.87       | 167.16      | 81.48       | 203.94 | 146.21 | 126.65 | 57.7<br>8   | 38.67  | 72.69       | 57.77  | 93.14  | 140.97 | 188.42      | 151.69 | 153.12 |
| linalool                                      | 200.06      | 551.21      | 271.19 | 625.02      | 1125.0<br>4 | 405.11      | 438.15 | 524.73 | 416.14 | 524.<br>36  | 227.09 | 489.32      | 319.71 | 403.42 | 477.99 | 586.18      | 467.77 | 492.65 |
| linalool oxide I                              | 0.21        | 0.12        | 0.10   | 0.34        | 0.61        | 0.27        | 0.12   | 0.35   | 0.51   | 0.14        | LOD    | LOQ         | 0.12   | 0.21   | 0.17   | 0.13        | 0.17   | 0.26   |
| linalool oxide II                             | 0.69        | 1.56        | 0.55   | 1.53        | 2.75        | 1.25        | 0.99   | 1.87   | 1.52   | 1.15        | 0.38   | 1.28        | 0.92   | 1.25   | 2.05   | 2.99        | 2.53   | 2.79   |
| Methyl anthranilate                           | 21.33       | 102.05      | 28.19  | 86.15       | 155.07      | 45.33       | 80.24  | 79.40  | 78.46  | 54.9<br>1   | 39.35  | 93.51       | 75.11  | 89.12  | 128.40 | 144.90      | 138.74 | 127.12 |
| Methyl benzoate                               | 83.23       | 503.94      | 150.28 | 419.07      | 754.33      | 246.11      | 194.85 | 280.18 | 219.43 | 407.<br>71  | 124.61 | 447.73      | 248.16 | 281.75 | 24.41  | 291.46      | 201.73 | 217.90 |
| methyl salicylate                             | 26.96       | 131.16      | 45.78  | 128.30      | 230.94      | 78.14       | 97.57  | 130.53 | 160.51 | 98.9<br>6   | 38.15  | 126.53      | 84.83  | 111.17 | 152.91 | 194.63      | 149.96 | 100.55 |
| n-Hexyl benzoate                              | 0.97        | 3.78        | 1.69   | 2.47        | 4.44        | 1.38        | 3.44   | 3.43   | 2.59   | 2.27        | 2.01   | 2.49        | 1.71   | 2.22   | 2.70   | 3.52        | 2.90   | 2.85   |
| Ocimene                                       | 0.69        | 0.26        | 0.46   | 1.21        | 2.17        | 1.33        | 1.18   | 0.91   | 1.24   | 0.68        | 0.29   | 0.42        | 1.59   | 2.18   | 1.96   | 3.53        | 1.36   | 3.02   |
| phenylethyl alcohol                           | 1681.2<br>7 | 1071.0<br>9 | 887.78 | 1198.9<br>4 | 2158.0<br>9 | 1539.4<br>4 | 569.82 | 986.16 | 963.19 | 1156<br>.49 | 758.48 | 1077.0<br>2 | 591.69 | 697.82 | 780.87 | 1113.8<br>7 | 972.05 | 672.25 |
| tetradecane                                   | 53.51       | 41.45       | 32.58  | 48.19       | 86.75       | 47.64       | 30.98  | 20.32  | LOD    | 39.9<br>2   | 24.48  | 36.61       | 20.54  | 29.74  | 23.98  | 33.43       | 34.90  | LOD    |
| Ylangene                                      | 0.32        | 0.70        | 0.28   | 0.64        | 1.16        | 0.40        | 0.62   | 0.51   | 0.43   | 0.47        | 0.30   | 0.22        | 0.37   | 0.59   | 0.70   | 0.79        | 0.51   | 0.90   |
| $\alpha$ -cadinene                            | 0.21        | 0.56        | 0.22   | 0.44        | 0.79        | 0.30        | 0.22   | 0.45   | 0.35   | 0.39        | 0.29   | 0.24        | 0.32   | 0.42   | 0.41   | 0.58        | 0.36   | 0.40   |

|                        |        |        |        |        |        |        |        |        |        |        |        |        |        |        |        |        |        |        |
|------------------------|--------|--------|--------|--------|--------|--------|--------|--------|--------|--------|--------|--------|--------|--------|--------|--------|--------|--------|
| $\alpha$ -Copaene      | 1.90   | 5.30   | 0.38   | 3.32   | 5.97   | 1.41   | 3.48   | 2.19   | 0.51   | 3.61   | LOD    | 0.53   | 0.83   | 2.84   | 2.51   | 4.36   | 1.93   | 0.77   |
| $\alpha$ -farnesene    | 318.50 | 608.97 | 303.07 | 453.18 | 815.72 | 318.99 | 534.42 | 514.10 | 291.24 | 485.98 | 274.80 | 416.41 | 276.81 | 429.57 | 426.72 | 643.97 | 442.93 | 293.65 |
| $\alpha$ -Muurolene    | 0.40   | 0.74   | 0.35   | 0.65   | 1.16   | 0.40   | 0.82   | 0.57   | 0.49   | 0.47   | 0.33   | 0.37   | 0.44   | 0.53   | 0.70   | 0.94   | 0.57   | 0.66   |
| $\alpha$ -zingiberene  | 198.61 | 366.76 | 193.68 | 318.32 | 572.97 | 245.66 | 394.87 | 334.95 | 239.11 | 300.61 | 168.00 | 211.03 | 272.13 | 345.91 | 296.93 | 483.58 | 279.98 | 270.37 |
| $\beta$ -caryophyllene | 6.34   | 8.33   | 2.53   | 2.97   | 5.34   | 2.37   | 8.79   | 2.38   | 0.70   | 9.15   | 0.23   | 2.82   | LOD    | 6.41   | 6.04   | 5.99   | 5.92   | 1.20   |
| $\beta$ -cyclocitral   | 6.77   | 7.29   | 4.97   | 2.44   | 4.39   | 3.55   | LOD    | 1.11   | 1.71   | 5.30   | 4.12   | 0.95   | LOQ    | LOQ    | LOD    | LOD    | LOD    | 0.08   |
| $\beta$ -myrcene       | 0.57   | 0.55   | 0.27   | 0.43   | 0.77   | 2.08   | 1.16   | 1.31   | 2.06   | 1.20   | 0.26   | 0.23   | 4.85   | 4.79   | 1.82   | 3.94   | 0.65   | 4.35   |
| $\beta$ -selinene      | 1.33   | 2.90   | 1.28   | 1.85   | 3.33   | 1.63   | 0.76   | 1.55   | 1.69   | 1.42   | 0.69   | 0.77   | LOD    | 0.14   | 0.38   | 0.42   | 0.54   | 0.73   |
| $\gamma$ -Cadinene     | 1.20   | 3.39   | 1.44   | 2.47   | 4.45   | 1.54   | 0.80   | 2.62   | 1.93   | 2.23   | 1.74   | 1.55   | 1.65   | 2.20   | 2.22   | 2.99   | 2.12   | 2.25   |
| $\gamma$ -Muurolene    | 41.19  | 60.71  | 32.89  | 22.69  | 40.84  | 17.87  | 45.85  | 29.04  | 14.14  | 53.34  | 27.23  | 35.25  | 8.11   | 15.16  | 22.52  | 28.03  | 26.13  | 11.91  |
| $\delta$ -Cadinene     | 1.80   | 3.32   | 1.66   | 2.49   | 4.48   | 1.74   | 3.30   | 2.49   | 1.93   | 2.23   | 1.64   | 1.55   | 1.65   | 2.28   | 2.41   | 3.33   | 2.16   | 2.59   |

**Table S5 The variations of OAV values of aroma components in jasmine flower and jasmine tea**

| Compounds              | Odors description                 | Odors attributes | Threshold (μg/L) | Odor activity value (OAV) of the traditional scented process jasmine |        |        |        |       |        |       |        | Odor activity value (OAV) of the new scented process jasmine |       |       |       |       |       |       |       | Odor activity value (OAV) of the jasmine flower |       |       |       |       |       |       |       | Finish |
|------------------------|-----------------------------------|------------------|------------------|----------------------------------------------------------------------|--------|--------|--------|-------|--------|-------|--------|--------------------------------------------------------------|-------|-------|-------|-------|-------|-------|-------|-------------------------------------------------|-------|-------|-------|-------|-------|-------|-------|--------|
|                        |                                   |                  |                  | 0h                                                                   | 2h     | 4h     | 6h     | 8h    | 10h    | 12h   | 14h    | 0h                                                           | 2h    | 4h    | 6h    | 8h    | 10h   | 12h   | 14h   | 0h                                              | 2h    | 4h    | 6h    | 8h    | 10h   | 12h   | 14h   |        |
| Phytol acetate         | Banana fragrance                  | Floral           | 750              | 7.82                                                                 | 9.70   | 12.60  | 22.38  | 17.00 | 27.29  | 12.56 | 28.03  | 19.38                                                        | 0.55  | 0.53  | 0.59  | 0.53  | 0.61  | 0.60  | 0.42  | 0.30                                            | 0.15  | 0.21  | 0.22  | 0.21  | 0.14  | 0.15  | 0.10  |        |
| Methyl benzoate        | Similar to pear and apricot aroma | Fragrant         | 110              | 12.80                                                                | 30.77  | 29.20  | 21.89  | 8.39  | 11.71  | 5.33  | 5.97   | 42.67                                                        | 0.91  | 0.84  | 1.38  | 1.25  | 1.38  | 1.37  | 0.96  | 0.10                                            | 0.11  | 0.05  | 0.07  | -     | -     | -     | 0.03  |        |
| Benzyl acetate         | Jasmine floral, fruity            | Floral           | 270              | 56.54                                                                | 102.49 | 74.25  | 110.77 | 49.87 | 74.98  | 49.50 | 63.81  | 183.62                                                       | 42.06 | 48.38 | 82.14 | 73.92 | 53.50 | 41.92 | 29.34 | 72.70                                           | 75.37 | 47.40 | 48.26 | 78.72 | 70.35 | 51.18 | 46.44 | 3.22   |
| Ethyl benzoate         | Fruity                            | Fragrant         | 30               | 8.02                                                                 | 27.73  | 21.74  | 24.85  | 7.88  | 3.51   | 3.38  | 1.07   | 26.72                                                        | 0.01  | 0.01  | 0.01  | 0.01  | 0.01  | 0.01  | 0.01  | 1.18                                            | 1.17  | 0.60  | 0.98  | -     | -     | -     | -     |        |
| Methyl 2-aminobenzoate | Grape fragrance                   | Floral           | 3                | 54.26                                                                | 76.89  | 49.76  | 76.41  | 45.37 | 44.23  | 35.11 | 34.33  | 140.72                                                       | 3.42  | 3.42  | 3.38  | 3.05  | 3.36  | 3.36  | 2.35  | 48.65                                           | 56.02 | 28.33 | 26.48 | -     | -     | -     | -     |        |
| Benzyl butyrate        | Similar to pear and apricot aroma | Fragrant         | 200              | 103.01                                                               | 187.58 | 135.82 | 202.74 | 91.51 | 137.84 | 91.40 | 118.06 | 0.41                                                         | 0.10  | 0.10  | 0.10  | 0.09  | 0.10  | 0.10  | 0.07  | 2.96                                            | 3.49  | 3.43  | 5.91  | 22.64 | 18.00 | 13.89 | 15.58 | 2.48   |
| N-hexyl benzoate       | Apple aroma                       | Fragrant         | 30               | 57.98                                                                | 65.95  | 57.05  | 101.03 | 48.98 | 40.68  | 1.76  | 19.71  | 0.61                                                         | 0.25  | 0.25  | 0.24  | 0.22  | 0.19  | 0.24  | 0.17  | 0.05                                            | -     | -     | -     | 0.05  | 0.04  | 0.06  | -     | 0.13   |

|                 |                                  |          |     |       |       |       |       |       |       |       |       |        |      |       |       |       |       |       |       |      |        |      |      |      |      |      |      |        |
|-----------------|----------------------------------|----------|-----|-------|-------|-------|-------|-------|-------|-------|-------|--------|------|-------|-------|-------|-------|-------|-------|------|--------|------|------|------|------|------|------|--------|
| alpha-farnesene | Cooked vegetables, flowers, wood | Fragrant | 450 | 33.54 | 33.87 | 29.43 | 40.87 | 21.66 | 25.68 | 15.40 | 22.75 | 0.70   | 4.89 | 33.17 | 73.69 | 66.32 | 42.06 | 40.87 | 28.61 | 1.76 | 1.70   | 0.61 | 0.55 | 0.37 | 0.77 | 0.49 | 0.46 | 0.01   |
| Cis-3-hexenol   | Green tea fragrance              | Fragrant | 70  | 0.78  | 1.88  | 2.10  | 4.74  | 4.37  | 5.98  | 3.40  | 46.11 | 14.06  | 0.39 | 0.38  | 0.55  | 0.49  | 0.75  | 0.85  | 0.60  | 0.03 | 0.03   | 0.02 | 0.02 | -    | -    | -    | -    | 0.10   |
| Benzyl alcohol  | Green smell                      | Fragrant | 400 | 7.38  | 12.10 | 8.69  | 10.70 | 7.74  | 11.69 | 6.89  | 11.48 | 160.36 | 0.16 | 0.15  | 0.30  | 0.27  | 0.14  | 0.11  | 0.08  | 0.03 | 497.00 | 9.99 | 5.84 | 9.59 | 0.33 | 8.25 | 4.63 | 111.19 |
| Linalool        | Sweet floral                     | Floral   | 10  | 19.24 | 34.06 | 28.04 | 45.09 | 25.00 | 28.54 | 18.10 | 28.55 | 0.11   | 3.48 | 4.05  | 7.87  | 7.08  | 6.38  | 5.08  | 3.56  | 0.32 | 0.21   | 0.14 | 0.11 | 0.21 | 0.36 | 0.26 | 0.30 | 0.13   |

| Compound,              | Odors description                 | Odors attributes | Threshold (μg/L) | Odor activity value (OAV) of the new scenting process tea |       |       |       |       |       |       |       |            |       | Odor activity value (OAV) of the traditional scenting process tea |       |       |       |       |       |       |            |  |  |
|------------------------|-----------------------------------|------------------|------------------|-----------------------------------------------------------|-------|-------|-------|-------|-------|-------|-------|------------|-------|-------------------------------------------------------------------|-------|-------|-------|-------|-------|-------|------------|--|--|
|                        |                                   |                  |                  | 0h                                                        | 2h    | 4h    | 6h    | 8h    | 10h   | 12h   | 14h   | Final shed | 0h    | 2h                                                                | 4h    | 6h    | 8h    | 10h   | 12h   | 14h   | Final shed |  |  |
| Phytol acetate         | Banana fragrance                  | Floral           | 750              | 6.04                                                      | 3.40  | 4.70  | 11.25 | 12.37 | 14.72 | 11.51 | 18.34 | 16.33      | 3.97  | 5.63                                                              | 9.25  | 15.70 | 17.65 | 27.18 | 16.04 | 24.43 | 2.44       |  |  |
| Methyl benzoate        | Similar to pear and apricot aroma | Fragrant         | 110              | 7.57                                                      | 45.81 | 13.66 | 38.10 | 41.91 | 22.37 | 17.71 | 25.47 | 19.95      | 11.33 | 40.70                                                             | 22.56 | 25.61 | 2.22  | 26.50 | 18.34 | 19.81 | 1.98       |  |  |
| Benzyl acetate         | Jasmine floral, fruity            | Floral           | 270              | 26.56                                                     | 50.55 | 37.16 | 68.72 | 75.59 | 44.44 | 35.83 | 55.76 | 42.19      | 35.75 | 45.33                                                             | 33.31 | 39.02 | 36.47 | 51.81 | 41.03 | 41.65 | 4.17       |  |  |
| Ethyl benzoate         | Fruity                            | Fragrant         | 30               | -                                                         | 0.02  | 0.18  | 0.10  | 0.11  | 0.06  | 0.27  | 0.34  | 0.31       | -     | -                                                                 | 0.12  | 0.35  | 0.38  | 0.49  | 0.61  | 0.30  | 0.03       |  |  |
| Methyl 2-aminobenzoate | Grape fragrance                   | Floral           | 3                | 71.10                                                     | 34.01 | 93.97 | 28.71 | 31.58 | 15.10 | 26.74 | 26.46 | 261.55     | 13.11 | 31.17                                                             | 25.03 | 29.70 | 42.80 | 48.29 | 46.24 | 42.37 | 42.37      |  |  |
| Benzyl butyrate        | Similar to pear and apricot aroma | Fragrant         | 200              | -                                                         | 0.01  | 0.01  | 0.02  | 0.02  | 0.02  | 0.06  | 0.02  | 0.04       | 0.04  | 0.11                                                              | 0.01  | 0.03  | 0.05  | 0.14  | 0.12  | 0.04  | 0.00       |  |  |
| N-hexyl benzoate       | Apple aroma                       | Fragrant         | 30               | 0.32                                                      | 1.26  | 0.56  | 0.82  | 0.90  | 0.46  | 1.15  | 1.14  | 0.86       | 0.67  | 0.83                                                              | 0.57  | 0.74  | 0.90  | 1.17  | 0.97  | 0.95  | 0.09       |  |  |
| alpha-farnesene        | Cooked vegetables, flowers, wood  | Fragrant         | 450              | 7.08                                                      | 13.53 | 6.73  | 10.07 | 11.08 | 7.09  | 11.88 | 11.42 | 6.47       | 6.11  | 9.25                                                              | 6.15  | 9.55  | 9.48  | 14.31 | 9.84  | 6.53  | 0.65       |  |  |
| Cis-3-hexenol          | Green tea fragrance               | Fragrant         | 70               | 1.94                                                      | 4.84  | 2.03  | 11.20 | 12.32 | 12.35 | 11.12 | 20.86 | 17.29      | -     | 6.85                                                              | 12.80 | 17.79 | 31.25 | 49.55 | 33.32 | 43.76 | 4.38       |  |  |

|                |              |          |     |     |     |     |     |     |     |     |     |        |     |     |     |     |     |     |     |     |       |
|----------------|--------------|----------|-----|-----|-----|-----|-----|-----|-----|-----|-----|--------|-----|-----|-----|-----|-----|-----|-----|-----|-------|
| Benzyl alcohol | Green smell  | Fragrant | 400 | 0.1 | 0.9 | 0.3 | 1.4 | 1.6 | 0.7 | 1.1 | 1.0 | 0.98   | 0.0 | 1.2 | 1.0 | 1.1 | 1.0 | 1.5 | 1.4 | 2.0 | 0.02  |
|                |              |          |     | 9   | 2   | 0   | 8   | 2   | 8   | 0   | 5   |        | 9   | 2   | 2   | 5   | 1   | 3   | 7   | 5   |       |
| Linalool       | Sweet floral | Floral   | 10  | 20  | 55  | 27  | 62  | 68  | 40  | 43  | 52  | 416.14 | 22  | 48  | 31  | 40  | 47  | 58  | 46  | 49  | 49.27 |
|                |              |          |     | 6   | 1   | 9   | 2   | 2   | 1   | 5   | 3   |        | 9   | 2   | 1   | 2   | 9   | 8   | 7   | 5   |       |

Note: ‘-’ indicates that OAV can’t be calculated

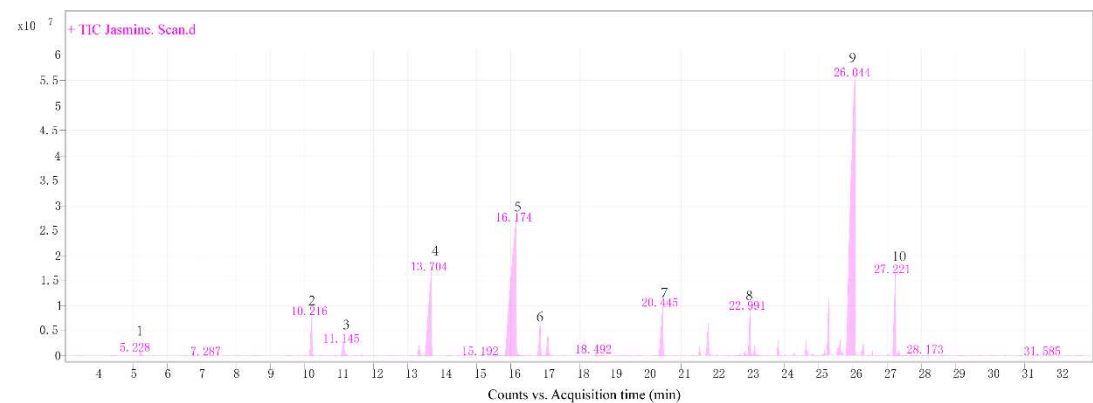

**Figure S1. The main identified compounds of jasmine in TIC.**

Note: 1, (Z)-3-Hexen-1-ol; 2, Acetic acid, hexyl ester; 3, Benzyl alcohol; 4, Linalool; 5, Acetic acid, phenylmethyl ester; 6, Benzoic acid, ethyl ester; 7, Indole; 8, Butyl benzoate; 9,  $\alpha$ -Farnesene; 10, (Z)-3-Hexen-1-ol, benzoate.

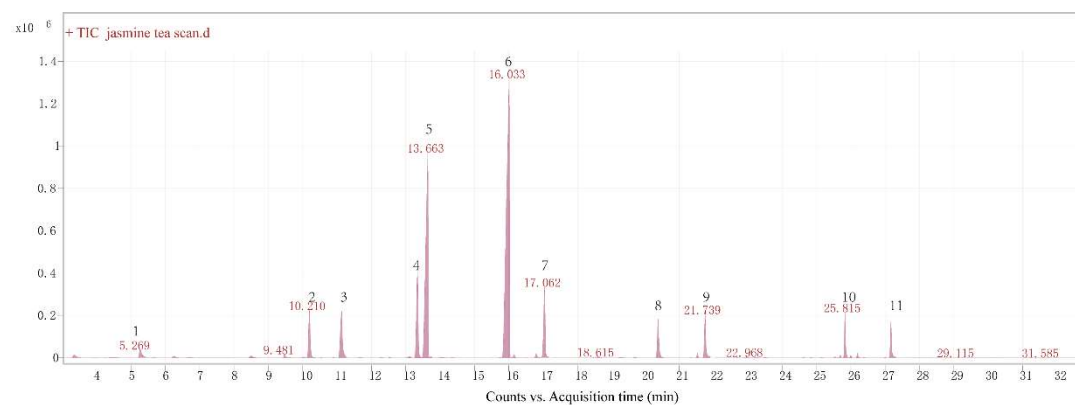

**Figure S2. The main identified compounds of jasmine tea in TIC.**

Note: 1, (Z)-3-Hexen-1-ol; 2, (E)-3-Hexenyl acetate; 3, Benzyl alcohol; 4, Methyl benzoate; 5, Linalool; 6, Benzoic acid, ethyl ester; 7, Methyl salicylate; 8, Indole; 9, Methyl anthranilate; 10,  $\alpha$ -Farnesene; 11, cis-3-Hexenyl benzoate.
